# Supplementary material for: Inhibition of Enzymes Involved in Neurodegenerative Disorders and Aβ1–40 Aggregation by Citrus limon Peel Polyphenol Extract
Source: MDPI journal article supplement (doi:10.3390/molecules28176332), 2023-08-30
Supplement: s1 [file s1]

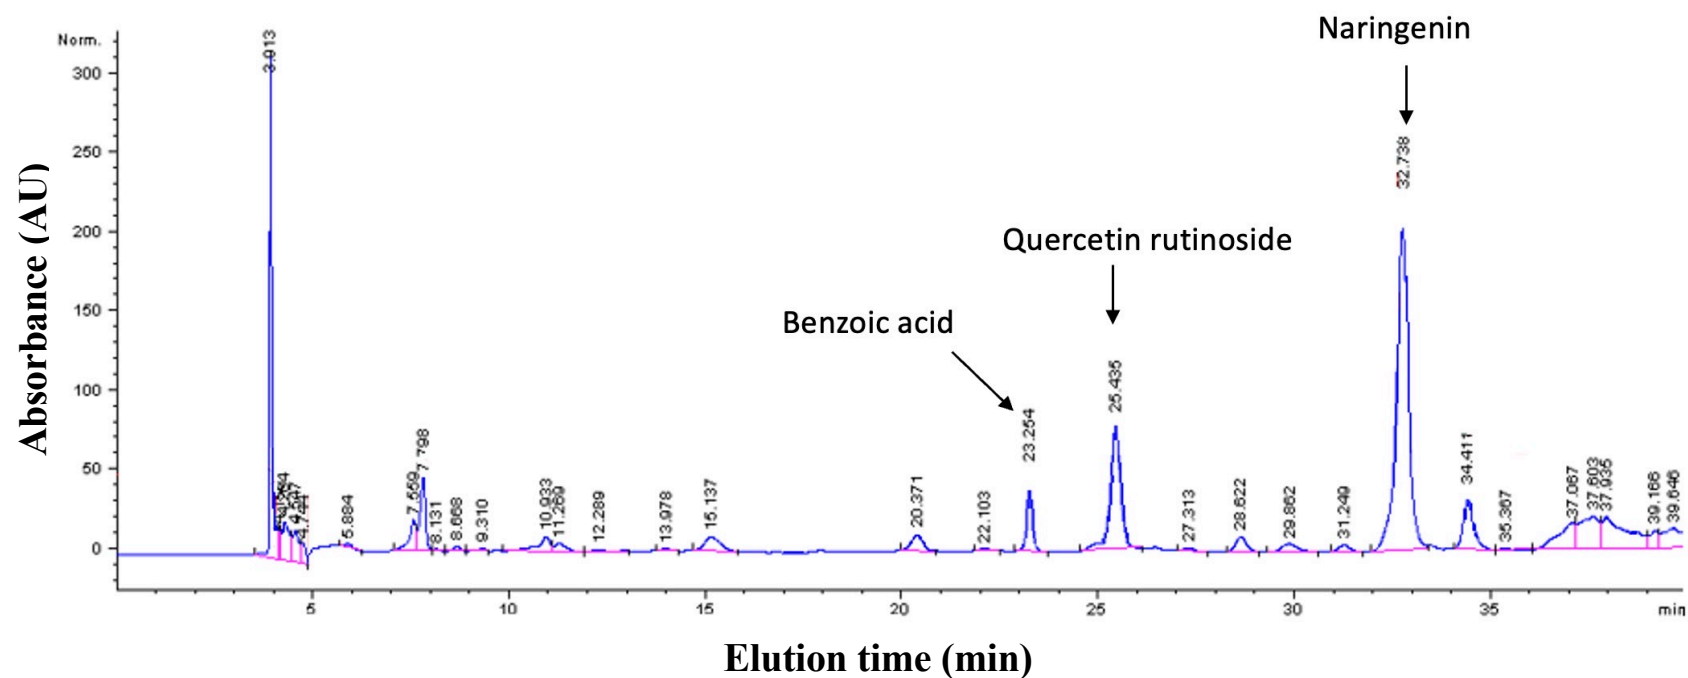

*Supplementary Figure S1. RP-HPLC profile of LPE.* Reverse phase (RP)-high performance liquid chromatography (HPLC) was carried out by means of a system equipped with an analytic Kromasyl C-18 column (250 × 4.6 mm, 5 μm particle sizes, Phenomenex) and a diode array detector (DAD, UV-2000), set at  $\lambda$  ranging from 280 to 350 nm. The column was eluted at room temperature by a flow rate of 1.0 ml/min with a gradient of Solvent A (acetonitrile) and Solvent B (0.5% acetic acid) set as follows: 90/10 (B/A) from 0 to 10 min, 70/30 (B/A) from 10 to 40 min and 90/10 (B/A) from 40 to 50 min. The main o-diphenols were identified on the basis of the retention time of authentic standard phenolic compounds naringenin, quercetin rutinoside and benzoic acid.
